# Supplementary material
Source: PubMed Central journal article supplement (PMC9134043)
Supplement: jamadermatol-e221706-s001.pdf [file jamadermatol-e221706-s001.pdf]

## Supplementary Online Content

Bowie AC, Tadrous M, Egeberg A, et al. Agreement and correlation between different topical corticosteroid potency classification systems. *JAMA Dermatol*. Published online May 25, 2022. doi:10.1001/jamadermatol.2022.1706

### **eMethods.**

**eTable 1.** Topical Corticosteroids Manually Assigned to a 7-Category Potency Classification

**eTable 2.** Reorganized 7-Category Potency Classifications

**eTable 3.** Final List of Topical Corticosteroid Potency Classifications

**eFigure 1.** Flowchart Outlining the Process of Developing a TCS List and Assigning a 7-Category Potency Classification Based on the US system

**eFigure 2.** Flowchart of the Process of Assigning the ATC Classifications to the Combined List of TCSs

### **eReferences.**

This supplementary material has been provided by the authors to give readers additional information about their work.

**eMethods.**

We used the following ranges to interpret Cohen's Kappa statistic: 0 - 0.20 = *None*, 0.21- 0.39 = *Minimal*, 0.40 - 0.59 = *Weak*, 0.60 - 0.79 = *Moderate*, 0.80 – 0.90 = *Strong*, >0.90 = *Almost Perfect*.<sup>25</sup>

The strength of the Spearman Rank Correlation Coefficients was interpreted using the following ranges: 0 – 0.19 = *Very Weak*, 0.20 – 0.39 = *Weak*, 0.40 – 0.59 = *Moderate*, 0.60 – 0.79 = *Strong*, 0.80 – 1.0 = *Very Strong*.<sup>26</sup>

**eTable 1.** Topical Corticosteroids Manually Assigned to a 7-Category Potency Classification

| Topical Corticosteroid                      | Original Category | Assigned Category      | Justification                                                                                  |
|---------------------------------------------|-------------------|------------------------|------------------------------------------------------------------------------------------------|
| <b>Previously unclassified TCS</b>          |                   |                        |                                                                                                |
| Beclomethasone Dipropionate 0.025% Lotion   | N/A               | (2) Potent             | Not classified by previous sources; a category was manually assigned by a dermatologist (AMD). |
| Beclomethasone Dipropionate 0.025% Ointment | N/A               | (2) Potent             | Not classified by previous sources; a category was manually assigned by a dermatologist (AMD). |
| Betamethasone Valerate 0.05% Ointment       | N/A               | (4) Mid-Strength       | Not classified by previous sources; a category was manually assigned by a dermatologist (AMD). |
| Clobetasone Butyrate 0.05% Ointment         | N/A               | (4) Mid-Strength       | Not classified by previous sources; a category was manually assigned by a dermatologist (AMD). |
| Flumetasone Pivalate 0.02% Ointment         | N/A               | (6) Mild               | Not classified by previous sources; a category was manually assigned by a dermatologist (AMD). |
| Fluocinolone Acetonide 0.01% Ointment       | N/A               | (5) Lower Mid-Strength | Not classified by previous sources; a category was manually assigned by a dermatologist (AMD). |
| Fluocinonide 0.01% Cream                    | N/A               | (3) Upper Mid-Strength | Not classified by previous sources; a category was manually assigned by a dermatologist (AMD). |
| Fluocinonide 0.01% Ointment                 | N/A               | (3) Upper Mid-Strength | Not classified by previous sources; a category was manually assigned by a dermatologist (AMD). |
| Flurandrenolide 0.0125% Cream               | N/A               | (6) Mild               | Not classified by previous sources; a category was manually assigned by a dermatologist (AMD). |

**eTable 1.** Topical Corticosteroids Manually Assigned to a 7-Category Potency Classification (continued).

| Topical Corticosteroid                                                                          | Original Category | Assigned Category      | Justification                                                                                                                                                                                                           |
|-------------------------------------------------------------------------------------------------|-------------------|------------------------|-------------------------------------------------------------------------------------------------------------------------------------------------------------------------------------------------------------------------|
| Flurandrenolide 0.0125% Ointment                                                                | N/A               | (5) Lower Mid-Strength | Not classified by previous sources; a category was manually assigned by a dermatologist (AMD).                                                                                                                          |
| Halcinonide 0.025% Cream                                                                        | N/A               | (4) Mid-Strength       | Not classified by previous sources; a category was manually assigned by a dermatologist (AMD).                                                                                                                          |
| Hydrocortisone Acetate 0.5% Ointment                                                            | N/A               | (7) Least Potent       | Not classified by previous sources; a category was manually assigned by a dermatologist (AMD).                                                                                                                          |
| Hydrocortisone Powder (Strength N.R)                                                            | N/A               | (7) Least Potent       | Not classified by previous sources; a category was manually assigned by a dermatologist (AMD).                                                                                                                          |
| <b>TCS identified in Cochrane Review not previously assigned to a 7-category classification</b> |                   |                        |                                                                                                                                                                                                                         |
| Alclometasone Dipropionate (Vehicle and strength N.R)                                           | N/A               | (6) Mild               | Alclometasone Dipropionate 0.05% cream and ointment were assigned to '(6) Mild', therefore assigned this to the same category.                                                                                          |
| Betamethasone Dipropionate Cream (Strength N.R)                                                 | N/A               | (3) Upper Mid-Strength | Assigned to the same category as Betamethasone Dipropionate 0.05% cream.                                                                                                                                                |
| Betamethasone Valerate 0.1% Ointment - Emollient                                                | N/A               | (3) Upper Mid-Strength | Assigned the same potency as Betamethasone Valerate 0.1% ointment.                                                                                                                                                      |
| Betamethasone Valerate 0.12% Ointment                                                           | N/A               | (3) Upper Mid-Strength | Assigned the same potency as Betamethasone Valerate 0.1% ointment.                                                                                                                                                      |
| Betamethasone Valerate Cream (Strength N.R)                                                     | N/A               | (4) Mid-Strength       | Betamethasone Valerate 0.1% was assigned to '(3) Upper Mid-Strength' and 0.05% and 0.01% were assigned to '(5) Lower Mid-strength'; therefore, assigned to (4) Mid-Strength which is between these two classifications. |
| Betamethasone Valerate Ointment (Strength N.R)                                                  | N/A               | (4) Mid-Strength       | Betamethasone Valerate 0.1% was assigned to '(3) Upper Mid-Strength' and 0.05% and 0.01% were assigned to '(5) Lower Mid-strength';                                                                                     |

**eTable 1.** Topical Corticosteroids Manually Assigned to a 7-Category Potency Classification (continued).

| Topical Corticosteroid                            | Original Category | Assigned Category      | Justification                                                                                                                                                                                                                                                              |
|---------------------------------------------------|-------------------|------------------------|----------------------------------------------------------------------------------------------------------------------------------------------------------------------------------------------------------------------------------------------------------------------------|
|                                                   |                   |                        | therefore, assigned to (4) Mid-Strength which is between these two classifications.                                                                                                                                                                                        |
| Betamethasone Valerate (Strength and vehicle N.R) | N/A               | (4) Mid-Strength       | Betamethasone Valerate 0.1% was assigned to '(3) Upper Mid-Strength' and 0.05% and 0.01% were assigned to '(5) Lower Mid-strength'; therefore, we assigned to (4) Mid-Strength which is between these two classifications.                                                 |
| Clobetasone 0.05% Cream                           | N/A               | (4) Mid-Strength       | Assigned to the same category as Clobetasone Butyrate which was assigned to '(4) Mid-Strength'.                                                                                                                                                                            |
| Clobetasone Butyrate Cream (Strength N.R)         | N/A               | (4) Mid-Strength       | Assigned to the same category as Clobetasone Butyrate 0.05% cream.                                                                                                                                                                                                         |
| Clobetasone Butyrate 0.05% Lotion                 | N/A               | (4) Mid-Strength       | Assigned to the same category as Clobetasone Butyrate 0.05% cream.                                                                                                                                                                                                         |
| Desonide 0.05% (Vehicle N.R)                      | N/A               | (6) Mild               | Assigned to the same category as Desonide 0.05% cream.                                                                                                                                                                                                                     |
| Desonide 0.1% Cream                               | N/A               | (5) Lower Mid-Strength | Desonide 0.05% cream was assigned to '(6) Mild', therefore we assigned this to one higher potency category.                                                                                                                                                                |
| Desonide 0.1% Cream*                              | N/A               | (5) Lower Mid-Strength | Desonide 0.05% cream was assigned to '(6) Mild', therefore we assigned this to one higher potency category.                                                                                                                                                                |
| Desonide 0.1% Ointment                            | N/A               | (5) Lower Mid-Strength | Desonide 0.05% cream was assigned to '(6) Mild', therefore we assigned this to one higher potency category.                                                                                                                                                                |
| Fluoclorolone Acetonide 0.2% Cream                | N/A               | (2) Potent             | Fluoclorolone Acetonide was shown to be more potent than Betamethasone Valerate, <sup>12</sup> therefore we assigned one category higher than Betamethasone Valerate 0.12% ointment, the highest strength B.V in our list, which was assigned to '(3) Upper Mid-strength'. |

**eTable 1.** Topical Corticosteroids Manually Assigned to a 7-Category Potency Classification (continued).

| Topical Corticosteroid                                       | Original Category | Assigned Category      | Justification                                                                                                                                                                                                                                                                       |
|--------------------------------------------------------------|-------------------|------------------------|-------------------------------------------------------------------------------------------------------------------------------------------------------------------------------------------------------------------------------------------------------------------------------------|
| Fluoclorolone Acetonide 0.2% Ointment                        | N/A               | (2) Potent             | Fluoclorolone Acetonide was shown to be more potent than Betamethasone Valerate. <sup>12</sup> Therefore, we assigned this to one category higher than Betamethasone Valerate 0.12% ointment (the highest strength B.V in our list) which was assigned to '(3) Upper Mid-strength'. |
| Flumetasone Pivalate 0.2% Ointment                           | N/A               | (5) Lower Mid-Strength | Assigned one higher than flumetasone pivalate ointment 0.02%                                                                                                                                                                                                                        |
| Fluocortin Butylester 0.75% Cream                            | N/A               | (7) Least Potent       | Shown to be similar in efficacy to hydrocortisone acetate. <sup>13</sup> Therefore, we assigned this to the same category as the majority of the other hydrocortisone acetate entries.                                                                                              |
| Fluocortolone 0.2% (Vehicle N.R)                             | N/A               | (4) Mid-Strength       | Assigned to '(4) Mid-Strength', consistent with the other Fluocortolone entries.                                                                                                                                                                                                    |
| Fluocortolone 0.5% Ointment                                  | N/A               | (4) Mid-Strength       | Assigned to '(4) Mid-Strength', consistent with the other Fluocortolone entries.                                                                                                                                                                                                    |
| Fluocortolone/Fluocortolone Carpoate 0.25% Cream - Emollient | N/A               | (4) Mid-Strength       | Betamethasone Valerate 0.1% ointment was shown to be superior to Fluocortolone Caproate. <sup>14</sup> Betamethasone Valerate 0.1% ointment was classified as '(3) Upper Mid-Strength', therefore we assigned this to '(4) Mid-strength'.                                           |
| Fluocortolone/Fluocortolone Carpoate 0.25% Ointment          | N/A               | (4) Mid-Strength       | Betamethasone Valerate 0.1% ointment was shown to be superior to Fluocortolone Caproate. <sup>14</sup> Betamethasone Valerate 0.1% ointment was classified as '(3) Upper Mid-Strength', therefore we assigned this to '(4) Mid-strength'.                                           |
| Fluprednidene Acetate 0.1% Cream                             | N/A               | (4) Mid-Strength       | Classified by some as 'Potent', <sup>15</sup> while others classified this as 'Moderate'. <sup>16</sup> Manually assigned to '(4) Mid-Strength' which is between moderate and potent.                                                                                               |
| Halometasone 0.05% Cream                                     | N/A               | (4) Mid-Strength       | Assigned to the same category as Clobetasone Butyrate 0.05% cream which was previously shown to be similar to Halometasone. <sup>17</sup>                                                                                                                                           |
| Hydrocortisone 0.5% Ointment - Emollient                     | N/A               | (7) Least Potent       | Assigned to '(7) Least Potent', consistent the other hydrocortisone entries.                                                                                                                                                                                                        |

**eTable 1.** Topical Corticosteroids Manually Assigned to a 7-Category Potency Classification (continued).

| Topical Corticosteroid                                 | Original Category | Assigned Category      | Justification                                                                                                                                                                                                                                               |
|--------------------------------------------------------|-------------------|------------------------|-------------------------------------------------------------------------------------------------------------------------------------------------------------------------------------------------------------------------------------------------------------|
| Hydrocortisone 1.0% Cream - Emollient                  | N/A               | (7) Least Potent       | Assigned to '(7) Least Potent', consistent the other hydrocortisone entries                                                                                                                                                                                 |
| Hydrocortisone Cream (Strength N.R)                    | N/A               | (7) Least Potent       | Assigned to '(7) Least Potent', consistent with other hydrocortisone entries.                                                                                                                                                                               |
| Hydrocortisone Buteprate 0.1% Cream - Emollient        | N/A               | (5) Lower Mid-Strength | Hydrocortisone Buteprate corresponds to 'Pandel' cream <sup>18</sup> which was classified as '(5) Lower Mid-Strength' in the data sources, but was assigned to the drug name 'Hydrocortisone'. Therefore, we assigned this TCS to '(5) Lower Mid-strength'. |
| Hydrocortisone Butyrate (Strength and vehicle N.R)     | N/A               | (5) Lower Mid-Strength | Assigned to '(5) Lower Mid-Strength', consistent with other hydrocortisone butyrate entries.                                                                                                                                                                |
| Methylprednisolone Aceponate Cream (Strength N.R)      | N/A               | (4) Mid-Strength       | Classified by some as 'Potent' <sup>15</sup> and 'Moderate' by others <sup>19, 20</sup> on a 4-category scale. Therefore, we manually assigned this to '(4) Mid-Strength' which is in-between moderate and potent.                                          |
| Methylprednisolone Aceponate 0.1% Cream                | N/A               | (4) Mid-Strength       | Classified by some as 'Potent' <sup>15</sup> and 'Moderate' by others <sup>19, 20</sup> on a 4-category scale. Therefore, we manually assigned this to '(4) Mid-Strength' which is in-between moderate and potent.                                          |
| Methylprednisolone Aceponate 0.1% Lotion               | N/A               | (4) Mid-Strength       | Classified by some as 'Potent' <sup>15</sup> and 'Moderate' by others <sup>19, 20</sup> on a 4-category scale. Therefore, we manually assigned this to '(4) Mid-Strength' which is in-between moderate and potent.                                          |
| Methylprednisolone Aceponate 0.1% Ointment             | N/A               | (4) Mid-Strength       | Classified by some as 'Potent' <sup>15</sup> and 'Moderate' by others <sup>19, 20</sup> on a 4-category scale. Therefore, we manually assigned this to '(4) Mid-Strength' which is in-between moderate and potent.                                          |
| Methylprednisolone Aceponate 0.1% Ointment - Emollient | N/A               | (4) Mid-Strength       | Classified by some as 'Potent' <sup>15</sup> and 'Moderate' by others <sup>19, 20</sup> on a 4-category scale. Therefore, we manually assigned this to '(4) Mid-Strength' which is in-between moderate and potent.                                          |
| Mometasone Furoate 0.1% Cream - Emollient              | N/A               | (4) Mid-Strength       | Assigned to '(4) Mid-Strength' to be consistent with most Mometasone Furoate entries.                                                                                                                                                                       |

**eTable 1.** Topical Corticosteroids Manually Assigned to a 7-Category Potency Classification (continued).

| Topical Corticosteroid                           | Original Category | Assigned Category      | Justification                                                                                                                                                                                                                                                                                                                 |
|--------------------------------------------------|-------------------|------------------------|-------------------------------------------------------------------------------------------------------------------------------------------------------------------------------------------------------------------------------------------------------------------------------------------------------------------------------|
| Mometasone Furoate Cream (Strength N.R)          | N/A               | (4) Mid-Strength       | Assigned to '(4) Mid-Strength' to be consistent with most Mometasone Furoate entries.                                                                                                                                                                                                                                         |
| Prednicarbate Ointment (Strength N.R)            | N/A               | (5) Lower Mid-Strength | Classified as '(5) Lower Mid-Strength' consistent with the majority of prednicarbate entries.                                                                                                                                                                                                                                 |
| Prednicarbate 0.25% Cream                        | N/A               | (4) Mid-Strength       | Classified as 'Moderate' by some <sup>21</sup> while others classified as 'Potent' <sup>7</sup> on a 4-category scale. UpToDate classified prednicarbate 0.1% as '(5) Lower mid-strength', <sup>5</sup> therefore we manually assigned this to '(4) Mid-Strength'.                                                            |
| Prednicarbate 0.25% Ointment                     | N/A               | (4) Mid-Strength       | Classified as 'Moderate' by some <sup>12</sup> while others classified as 'Potent' <sup>7</sup> on a 4-category scale. UpToDate classified prednicarbate 0.1% as '(5) Lower mid-strength', <sup>17</sup> therefore we manually assigned this to '(4) Mid-Strength'.                                                           |
| Prednisolone Valerate Acetate 0.3% (Vehicle N.R) | N/A               | (4) Mid-Strength       | Shown to be similar in efficacy as Betamethasone Valerate 0.1% ointment and cream. <sup>22</sup> We assigned ointment to '(3) Upper Mid-Strength' and cream to '(5) Lower Mid-Strength', therefore we assigned this (with no vehicle reported) to '(4) Mid-Strength' which is in-between.                                     |
| Tralonide 0.025% Ointment                        | N/A               | (4) Mid-Strength       | Tralonide was shown to be similar to flurandrenolone acetonide (also known as fludroxycortide) for psoriasis, but more effective for eczema. <sup>23</sup> Fludroxycortide cream was assigned to '(5) Lower Mid-strength' and ointment was assigned to '(4) Mid-Strength'. Therefore, we assigned this to '(4) Mid-Strength'. |
| Triamcinolone 0.1% Cream                         | N/A               | (5) Lower Mid-Strength | Assigned to the same category as Triamcinolone Acetonide 0.1% cream.                                                                                                                                                                                                                                                          |
| Triamcinolone 0.1% Ointment                      | N/A               | (4) Mid-Strength       | Assigned to the same category as Triamcinolone Acetonide 0.1% ointment.                                                                                                                                                                                                                                                       |



**eTable 1.** Topical Corticosteroids Manually Assigned to a 7-Category Potency Classification (continued).

| Topical Corticosteroid                                                                             | Original Category      | Assigned Category      | Justification                                                                                                                                                                                                                           |
|----------------------------------------------------------------------------------------------------|------------------------|------------------------|-----------------------------------------------------------------------------------------------------------------------------------------------------------------------------------------------------------------------------------------|
| <b>TCS identified in ATC Classification not previously assigned to a 7-category classification</b> |                        |                        |                                                                                                                                                                                                                                         |
| Hydrocortisone Aceponate 0.1% Cream                                                                | N/A                    | (5) Lower Mid-Strength | Classified by some as 'Moderate', <sup>15, 21</sup> and 'Potent' by others <sup>24</sup> on a 4-category scale; therefore we assigned this to '(5) Mid-Strength' which is between moderate and potent.                                  |
| Hydrocortisone Aceponate 0.1% Ointment                                                             | N/A                    | (5) Lower Mid-Strength | Classified by some as 'Moderate', <sup>15, 21</sup> and 'Potent' by others <sup>24</sup> on 4-category scale; therefore we assigned this to '(5) Mid-Strength' which is between moderate and potent.                                    |
| <b>TCS with incoherent classifications relative to other TCS categories</b>                        |                        |                        |                                                                                                                                                                                                                                         |
| Betamethasone Valerate 0.01% Lotion                                                                | (5) Lower Mid-Strength | (6) Mild               | Classified under category 5 by only one source. <sup>10</sup> Betamethasone valerate 0.1% lotion and 0.05% ointment were classified under category 6, therefore this category was changed from 5 to 6 to remain consistent with others. |
| Flumetasone Pivalate 0.02% Cream                                                                   | (5) Lower Mid-Strength | (6) Mild               | Classified under category 5 by only one source. <sup>9</sup> Flumetasone 0.03% cream and 0.02% ointment were classified under category 6, therefore this category was changed from 5 to 6 (Mild).                                       |

Abbreviation: N.R, Not Reported

**eTable 2.** Reorganized 7-Category Potency Classifications

| <b>Original US Classification</b> | <b>Reverse-Coded</b>   | <b>Consolidated<sup>a</sup></b> |
|-----------------------------------|------------------------|---------------------------------|
| (1) Super Potent                  | (7) Super Potent       | (4) Very Potent                 |
| (2) Potent                        | (6) Potent             | (3) Potent                      |
| (3) Upper Mid-Strength            | (5) Upper Mid-Strength |                                 |
| (4) Mid-Strength                  | (4) Mid-Strength       | (2) Moderate                    |
| (5) Lower Mid-Strength            | (3) Lower Mid-Strength |                                 |
| (6) Mild                          | (2) Mild               | (1) Weak                        |
| (7) Least Potent                  | (1) Least Potent       |                                 |

<sup>a</sup>As shown in WHO, 1997<sup>6</sup>

**eTable 3. Final List of Topical Corticosteroid Potency Classifications**

| ATC                       | Corticosteroid                 | Vehicle              | Concentration | US Classification (7-Category) | Cochrane Review (4-Category) | ATC Classification (4-Category) |
|---------------------------|--------------------------------|----------------------|---------------|--------------------------------|------------------------------|---------------------------------|
| ALCLOMETASONE<br>D07AB10  | ALCLOMETASONE                  | N.R                  | N.R           | (6) Mild                       | (2) Moderate                 | (2) Moderate                    |
|                           | ALCLOMETASONE<br>DIPROPIONATE  | CREAM                | 0.05%         | (6) Mild                       | (2) Moderate                 | (2) Moderate                    |
|                           |                                | OINTMENT             | 0.05%         | (6) Mild                       | (2) Moderate                 | (2) Moderate                    |
| AMCINONIDE<br>D07AC11     | AMCINONIDE                     | CREAM                | 0.1%          | (3) Upper Mid-Strength         |                              | (3) Potent                      |
|                           |                                | LOTION               | 0.1%          | (3) Upper Mid-Strength         |                              | (3) Potent                      |
|                           |                                | OINTMENT             | 0.1%          | (2) Potent                     |                              | (3) Potent                      |
| BECLOMETHASONE<br>D07AC15 | BECLOMETHASONE                 | CREAM                | 0.025%        | (4) Mid-Strength               |                              | (3) Potent                      |
|                           | BECLOMETHASONE<br>DIPROPIONATE | LOTION               | 0.025%        | (2) Potent                     |                              | (3) Potent                      |
|                           |                                | OINTMENT             | 0.025%        | (2) Potent                     |                              | (3) Potent                      |
| BETAMETHASONE<br>D07AC01  | BETAMETHASONE                  | CREAM                | 0.025%        | (5) Lower Mid-Strength         |                              | (3) Potent                      |
|                           | BETAMETHASONE<br>BENZOATE      | GEL                  | 0.025%        | (4) Mid-Strength               |                              | (3) Potent                      |
|                           |                                | LOTION               | 0.025%        | (5) Lower Mid-Strength         |                              | (3) Potent                      |
|                           | BETAMETHASONE<br>DIPROPIONATE  | SPRAY                | 0.05%         | (4) Mid-Strength               |                              | (3) Potent                      |
|                           |                                | SPRAY                | 0.1%          | (2) Potent                     |                              | (3) Potent                      |
|                           |                                | CREAM                | N.R           | (3) Upper Mid-Strength         | (3) Potent                   | (3) Potent                      |
|                           |                                | CREAM -<br>EMOLLIENT | 0.05%         | (3) Upper Mid-Strength         |                              | (3) Potent                      |
|                           |                                | CREAM*               | 0.05%         | (2) Potent                     |                              | (3) Potent                      |
|                           |                                | CREAM                | 0.05%         | (3) Upper Mid-Strength         | (3) Potent                   | (3) Potent                      |
|                           |                                | GEL*                 | 0.05%         | (1) Super Potent               |                              | (3) Potent                      |
|                           |                                | GEL                  | 0.05%         | (2) Potent                     |                              | (3) Potent                      |
|                           |                                | LOTION*              | 0.05%         | (1) Super Potent               |                              | (3) Potent                      |
|                           |                                | LOTION               | 0.02%         | (5) Lower Mid-Strength         |                              | (3) Potent                      |
|                           |                                | LOTION               | 0.05%         | (5) Lower Mid-Strength         |                              | (3) Potent                      |
|                           |                                | OINTMENT*            | 0.05%         | (1) Super Potent               |                              | (3) Potent                      |
|                           |                                | OINTMENT             | 0.05%         | (2) Potent                     | (3) Potent                   | (3) Potent                      |
|                           | BETAMETHASONE<br>VALERATE      | N.R                  | N.R           | (4) Mid-Strength               | (3) Potent                   | (3) Potent                      |
|                           |                                | AEROSOL<br>FOAM      | 0.12%         | (3) Upper Mid-Strength         |                              | (3) Potent                      |
|                           |                                | PATCH                | 0.1%          | (3) Upper Mid-Strength         |                              | (3) Potent                      |

**eTable 3.** Final list of Topical Corticosteroid Potency Classifications (continued).

| ATC                               | Corticosteroid                     | Vehicle                        | Concentration | US Classification (7-Category) | Cochrane Review (4-Category) | ATC Classification (4-Category) |
|-----------------------------------|------------------------------------|--------------------------------|---------------|--------------------------------|------------------------------|---------------------------------|
| BETAMETHASONE<br>D07AC01 (cont'd) | BETAMETHASONE<br>VALERATE (cont'd) | CREAM                          | N.R           | (4) Mid-Strength               | (3) Potent                   | (3) Potent                      |
|                                   |                                    | CREAM                          | 0.01%         | (5) Lower Mid-Strength         |                              | (3) Potent                      |
|                                   |                                    | CREAM                          | 0.05%         | (5) Lower Mid-Strength         |                              | (3) Potent                      |
|                                   |                                    | CREAM                          | 0.1%          | (5) Lower Mid-Strength         | (3) Potent                   | (3) Potent                      |
|                                   |                                    | LOTION                         | 0.01%         | (6) Mild                       |                              | (3) Potent                      |
|                                   |                                    | LOTION                         | 0.05%         | (6) Mild                       |                              | (3) Potent                      |
|                                   |                                    | LOTION                         | 0.1%          | (6) Mild                       |                              | (3) Potent                      |
|                                   |                                    | OINTMENT                       | N.R           | (4) Mid-Strength               | (3) Potent                   | (3) Potent                      |
|                                   |                                    | OINTMENT -<br>EMOLLIENT        | 0.1%          | (3) Upper Mid-Strength         | (3) Potent                   | (3) Potent                      |
|                                   |                                    | OINTMENT                       | 0.05%         | (4) Mid-Strength               |                              | (3) Potent                      |
|                                   |                                    | OINTMENT                       | 0.1%          | (3) Upper Mid-Strength         | (3) Potent                   | (3) Potent                      |
|                                   |                                    | OINTMENT                       | 0.12%         | (3) Upper Mid-Strength         | (3) Potent                   | (3) Potent                      |
| CLOBETASOL<br>D07AD01             | CLOBETASOL                         | AEROSOL<br>FOAM -<br>EMOLLIENT | 0.05%         | (1) Super Potent               |                              | (4) Very Potent                 |
| CLOBETASOL<br>D07AD01 (cont'd)    | CLOBETASOL<br>PROPIONATE           | AEROSOL<br>FOAM                | 0.05%         | (1) Super Potent               |                              | (4) Very Potent                 |
|                                   |                                    | SHAMPOO                        | 0.05%         | (1) Super Potent               |                              | (4) Very Potent                 |
|                                   |                                    | SPRAY                          | 0.05%         | (1) Super Potent               |                              | (4) Very Potent                 |
|                                   |                                    | CREAM -<br>EMOLLIENT           | 0.05%         | (1) Super Potent               |                              | (4) Very Potent                 |
|                                   |                                    | CREAM                          | 0.025%        | (2) Potent                     |                              | (4) Very Potent                 |
|                                   |                                    | CREAM                          | 0.05%         | (1) Super Potent               | (4) Very Potent              | (4) Very Potent                 |
|                                   |                                    | GEL                            | 0.05%         | (1) Super Potent               |                              | (4) Very Potent                 |
|                                   |                                    | LOTION                         | 0.05%         | (1) Super Potent               |                              | (4) Very Potent                 |
|                                   |                                    | OINTMENT                       | 0.05%         | (1) Super Potent               | (4) Very Potent              | (4) Very Potent                 |
|                                   |                                    | SCALP<br>SOLUTION              | 0.05%         | (1) Super Potent               |                              | (4) Very Potent                 |
|                                   |                                    | SOLUTION                       | 0.05%         | (1) Super Potent               |                              | (4) Very Potent                 |
|                                   |                                    |                                |               |                                |                              |                                 |
|                                   |                                    |                                |               |                                |                              |                                 |

**eTable 3.** Final list of Topical Corticosteroid Potency Classifications (continued).

| ATC                               | Corticosteroid                    | Vehicle                | Concentration    | US Classification (7-Category) | Cochrane Review (4-Category) | ATC Classification (4-Category) |
|-----------------------------------|-----------------------------------|------------------------|------------------|--------------------------------|------------------------------|---------------------------------|
| CLOBETASONE<br>D07AB01            | CLOBETASONE                       | CREAM                  | N.R              | (4) Mid-Strength               | (2) Moderate                 | (2) Moderate                    |
|                                   |                                   |                        | 0.05%            | (4) Mid-Strength               | (2) Moderate                 | (2) Moderate                    |
|                                   | CLOBETASONE<br>BUTYRATE           | CREAM                  | 0.05%            | (4) Mid-Strength               | (2) Moderate                 | (2) Moderate                    |
|                                   |                                   | LOTION                 | 0.05%            | (4) Mid-Strength               | (2) Moderate                 | (2) Moderate                    |
|                                   | OINTMENT                          | 0.05%                  | (4) Mid-Strength | (2) Moderate                   | (2) Moderate                 |                                 |
| CLOCORTOLONE<br>D07AB21           | CLOCORTOLONE                      | CREAM                  | 0.1%             | (4) Mid-Strength               | (2) Moderate                 | (2) Moderate                    |
| DESONIDE<br>D07AB08               | DESONIDE                          | N.R                    | 0.05%            | (6) Mild                       | (1) Mild                     | (2) Moderate                    |
|                                   |                                   | AEROSOL<br>FOAM        | 0.05%            | (6) Mild                       |                              | (2) Moderate                    |
|                                   |                                   | CREAM*                 | 0.1%             | (5) Lower Mid-Strength         | (1) Mild                     | (2) Moderate                    |
|                                   |                                   | CREAM                  | 0.05%            | (6) Mild                       | (1) Mild                     | (2) Moderate                    |
|                                   |                                   | CREAM                  | 0.1%             | (5) Lower Mid-Strength         | (2) Moderate                 | (2) Moderate                    |
|                                   |                                   | GEL                    | 0.05%            | (5) Lower Mid-Strength         |                              | (2) Moderate                    |
|                                   |                                   | LOTION                 | 0.05%            | (6) Mild                       | (1) Mild                     | (2) Moderate                    |
|                                   |                                   | OINTMENT               | 0.05%            | (5) Lower Mid-Strength         | (2) Moderate                 | (2) Moderate                    |
| OINTMENT                          | 0.1%                              | (5) Lower Mid-Strength | (2) Moderate     | (2) Moderate                   |                              |                                 |
| DESOXIMETASONE<br>D07AC03         | DESOXIMETASONE                    | SPRAY                  | 0.25%            | (2) Potent                     |                              | (3) Potent                      |
|                                   |                                   | CREAM -<br>EMOLLIENT   | 0.25%            | (4) Mid-Strength               |                              | (3) Potent                      |
|                                   |                                   | CREAM                  | 0.025%           | (2) Potent                     |                              | (3) Potent                      |
|                                   |                                   | CREAM                  | 0.05%            | (3) Upper Mid-Strength         |                              | (3) Potent                      |
|                                   |                                   | CREAM                  | 0.25%            | (2) Potent                     |                              | (3) Potent                      |
|                                   |                                   | GEL                    | 0.05%            | (2) Potent                     |                              | (3) Potent                      |
|                                   |                                   | OINTMENT               | 0.025%           | (2) Potent                     |                              | (3) Potent                      |
|                                   |                                   | OINTMENT               | 0.05%            | (3) Upper Mid-Strength         |                              | (3) Potent                      |
| OINTMENT                          | 0.25%                             | (2) Potent             |                  | (3) Potent                     |                              |                                 |
| DEXAMETHASONE<br>D07AB19          | DEXAMETHASONE                     | N.R                    | N.R              | (7) Least Potent               |                              | (2) Moderate                    |
| DEXAMETHASONE<br>D07AB19 (cont'd) | DEXAMETHASONE<br>SODIUM PHOSPHATE | CREAM                  | 0.1%             | (7) Least Potent               |                              | (2) Moderate                    |

**eTable 3.** Final list of Topical Corticosteroid Potency Classifications (continued).

| ATC                        | Corticosteroid             | Vehicle              | Concentration         | US Classification (7-Category) | Cochrane Review (4-Category) | ATC Classification (4-Category) |
|----------------------------|----------------------------|----------------------|-----------------------|--------------------------------|------------------------------|---------------------------------|
| DIFLORASONE<br>D07AC10     | DIFLORASONE                | CREAM - EMOLLIENT    | 0.05%                 | (2) Potent                     |                              | (3) Potent                      |
|                            | DIFLORASONE<br>DIACETATE   | CREAM*               | 0.05%                 | (2) Potent                     |                              | (3) Potent                      |
|                            |                            | CREAM                | 0.05%                 | (3) Upper Mid-Strength         | (2) Moderate                 | (3) Potent                      |
|                            |                            | OINTMENT - EMOLLIENT | 0.05%                 | (2) Potent                     |                              | (3) Potent                      |
|                            |                            | OINTMENT*            | 0.05%                 | (1) Super Potent               |                              | (3) Potent                      |
|                            |                            | OINTMENT             | 0.05%                 | (2) Potent                     | (4) Very Potent              | (3) Potent                      |
| DIFLUCORTOLONE<br>D07AC06  | DIFLUCORTOLONE             | CREAM - EMOLLIENT    | 0.1%                  | (3) Upper Mid-Strength         | (3) Potent                   | (3) Potent                      |
|                            | DIFLUCORTOLONE<br>VALERATE | CREAM - EMOLLIENT    | 0.3%                  | (1) Super Potent               |                              | (3) Potent                      |
|                            |                            | CREAM                | 0.1%                  | (3) Upper Mid-Strength         | (3) Potent                   | (3) Potent                      |
|                            |                            | OINTMENT             | 0.1%                  | (3) Upper Mid-Strength         | (3) Potent                   | (3) Potent                      |
|                            |                            | OINTMENT             | 0.3%                  | (1) Super Potent               |                              | (3) Potent                      |
| FLUCLOROLONE<br>D07AC02    | FLUCLOROLONE               | CREAM                | 0.2%                  | (2) Potent                     | (3) Potent                   | (3) Potent                      |
|                            | FLUCLOROLONE<br>ACETONIDE  | OINTMENT             | 0.2%                  | (2) Potent                     | (3) Potent                   | (3) Potent                      |
| FLUDROXYCORTIDE<br>D07AC07 | FLUDROXYCORTIDE            | CREAM                | 0.05%                 | (5) Lower Mid-Strength         |                              | (3) Potent                      |
|                            |                            | OINTMENT             | 0.05%                 | (4) Mid-Strength               |                              | (3) Potent                      |
|                            | FLURANDRENOLIDE            | TAPE                 | 4 mcg/cm <sup>2</sup> | (1) Super Potent               |                              | (3) Potent                      |
|                            |                            | CREAM                | 0.0125%               | (6) Mild                       |                              | (3) Potent                      |
|                            |                            | CREAM                | 0.025%                | (6) Mild                       |                              | (3) Potent                      |
|                            |                            | CREAM                | 0.05%                 | (5) Lower Mid-Strength         |                              | (3) Potent                      |
|                            |                            | LOTION               | 0.05%                 | (5) Lower Mid-Strength         |                              | (3) Potent                      |
|                            |                            | LOTION               | 0.5%                  | (5) Lower Mid-Strength         |                              | (3) Potent                      |
|                            |                            | OINTMENT             | 0.0125%               | (5) Lower Mid-Strength         |                              | (3) Potent                      |
|                            |                            | OINTMENT             | 0.025%                | (5) Lower Mid-Strength         |                              | (3) Potent                      |
| OINTMENT                   | 0.05%                      | (4) Mid-Strength     | (2) Moderate          | (3) Potent                     |                              |                                 |
| FLUMETASONE<br>D07AB03     | FLUMETASONE                | CREAM                | 0.02%                 | (6) Mild                       | (1) Mild                     | (2) Moderate                    |
|                            | FLUMETASONE<br>PIVALATE    | CREAM                | 0.03%                 | (6) Mild                       |                              | (2) Moderate                    |
|                            |                            | OINTMENT             | 0.02%                 | (6) Mild                       |                              | (2) Moderate                    |

**eTable 3.** Final list of Topical Corticosteroid Potency Classifications (continued).

| ATC                                  | Corticosteroid                              | Vehicle              | Concentration | US Classification (7-Category) | Cochrane Review (4-Category) | ATC Classification (4-Category) |
|--------------------------------------|---------------------------------------------|----------------------|---------------|--------------------------------|------------------------------|---------------------------------|
| FLUMETASONE<br>D07AB03               | FLUMETASONE<br>PIVALATE (cont'd)            | OINTMENT             | 0.2%          | (5) Lower Mid-Strength         | (2) Moderate                 | (2) Moderate                    |
| FLUOCINOLONE<br>ACETONIDE<br>D07AC04 | FLUOCINOLONE<br>ACETONIDE                   | OIL                  | 0.01%         | (6) Mild                       |                              | (3) Potent                      |
|                                      |                                             | SHAMPOO              | 0.01%         | (6) Mild                       |                              | (3) Potent                      |
|                                      |                                             | CREAM                | 0.01%         | (6) Mild                       | (2) Moderate                 | (3) Potent                      |
|                                      |                                             | CREAM                | 0.025%        | (5) Lower Mid-Strength         | (3) Potent                   | (3) Potent                      |
|                                      |                                             | CREAM                | 0.05%         | (4) Mid-Strength               |                              | (3) Potent                      |
|                                      |                                             | CREAM                | 0.2%          | (4) Mid-Strength               |                              | (3) Potent                      |
|                                      |                                             | OINTMENT             | 0.01%         | (5) Lower Mid-Strength         |                              | (3) Potent                      |
|                                      |                                             | OINTMENT             | 0.025%        | (4) Mid-Strength               | (3) Potent                   | (3) Potent                      |
|                                      |                                             | SOLUTION             | 0.01%         | (6) Mild                       |                              | (3) Potent                      |
| FLUOCINONIDE<br>D07AC08              | FLUOCINONIDE                                | CREAM -<br>EMOLLIENT | 0.05%         | (3) Upper Mid-Strength         | (3) Potent                   | (3) Potent                      |
|                                      |                                             | CREAM                | 0.01%         | (3) Upper Mid-Strength         |                              | (3) Potent                      |
|                                      |                                             | CREAM                | 0.05%         | (2) Potent                     | (3) Potent                   | (3) Potent                      |
|                                      |                                             | CREAM                | 0.1%          | (1) Super Potent               | (4) Very Potent              | (3) Potent                      |
|                                      |                                             | GEL                  | 0.05%         | (2) Potent                     |                              | (3) Potent                      |
|                                      |                                             | OINTMENT             | 0.01%         | (3) Upper Mid-Strength         |                              | (3) Potent                      |
|                                      |                                             | OINTMENT             | 0.05%         | (2) Potent                     |                              | (3) Potent                      |
|                                      |                                             | SOLUTION             | 0.05%         | (2) Potent                     |                              | (3) Potent                      |
| FLUOCORTIN<br>D07AB04                | FLUOCORTIN                                  | CREAM                | 0.75%         | (7) Least Potent               | (1) Mild                     | (2) Moderate                    |
| FLUOCORTOLONE<br>D07AC05             | FLUOCORTOLONE                               | N.R                  | 0.2%          | (4) Mid-Strength               | (2) Moderate                 | (3) Potent                      |
|                                      |                                             | OINTMENT             | 0.5%          | (4) Mid-Strength               | (2) Moderate                 | (3) Potent                      |
| FLUOCORTOLONE<br>D07AC05 (cont'd)    | FLUOCORTOLONE/<br>FLUOCORTOLONE<br>CAPROATE | CREAM -<br>EMOLLIENT | 0.25%         | (4) Mid-Strength               | (2) Moderate                 | (3) Potent                      |
|                                      |                                             | OINTMENT             | 0.25%         | (4) Mid-Strength               | (2) Moderate                 | (3) Potent                      |
| FLUPREDNIDENE<br>D07AB07             | FLUPREDNIDENE                               | CREAM                | 0.1%          | (4) Mid-Strength               | (2) Moderate                 | (2) Moderate                    |
| FLUTICASONE<br>D07AC17               | FLUTICASONE                                 | CREAM                | 0.05%         | (5) Lower Mid-Strength         | (3) Potent                   | (3) Potent                      |
|                                      | FLUTICASONE                                 | LOTION               | 0.05%         | (5) Lower Mid-Strength         |                              | (3) Potent                      |
|                                      | PROPIONATE                                  | OINTMENT             | 0.005%        | (3) Upper Mid-Strength         | (3) Potent                   | (3) Potent                      |

**eTable 3.** Final list of Topical Corticosteroid Potency Classifications (continued).

| ATC                       | Corticosteroid                    | Vehicle           | Concentration    | US Classification (7-Category) | Cochrane Review (4-Category) | ATC Classification (4-Category) |
|---------------------------|-----------------------------------|-------------------|------------------|--------------------------------|------------------------------|---------------------------------|
| HALCINONIDE<br>D07AD02    | HALCINONIDE                       | CREAM - EMOLLIENT | 0.1%             | (2) Potent                     |                              | (4) Very Potent                 |
|                           |                                   | CREAM             | 0.025%           | (4) Mid-Strength               |                              | (4) Very Potent                 |
|                           |                                   | CREAM             | 0.1%             | (2) Potent                     | (3) Potent                   | (4) Very Potent                 |
|                           |                                   | OINTMENT          | 0.1%             | (2) Potent                     |                              | (4) Very Potent                 |
|                           |                                   | SOLUTION          | 0.1%             | (2) Potent                     |                              | (4) Very Potent                 |
| HALOMETASONE<br>D07AC12   | HALOMETASONE                      | CREAM             | 0.05%            | (4) Mid-Strength               | (3) Potent                   | (3) Potent                      |
| HYDROCORTISONE<br>D07AA02 | HYDROCORTISONE                    | N.R               | N.R              | (7) Least Potent               |                              | (1) Weak                        |
|                           | HYDROCORTISONE &<br>PRAMOXINE HCL | CREAM             | 1.0%             | (7) Least Potent               |                              | (1) Weak                        |
|                           |                                   | CREAM             | 2.5%             | (7) Least Potent               |                              | (1) Weak                        |
|                           |                                   | LOTION            | 1.0%             | (7) Least Potent               |                              | (1) Weak                        |
|                           |                                   | LOTION            | 2.5%             | (7) Least Potent               |                              | (1) Weak                        |
|                           |                                   | OINTMENT          | 1.0%             | (7) Least Potent               |                              | (1) Weak                        |
|                           |                                   | OINTMENT          | 2.5%             | (7) Least Potent               |                              | (1) Weak                        |
|                           | HYDROCORTISONE<br>ACETATE         | AEROSOL<br>FOAM   | 1.0%             | (7) Least Potent               |                              | (1) Weak                        |
|                           |                                   | CREAM             | 0.5%             | (7) Least Potent               |                              | (1) Weak                        |
|                           |                                   | CREAM             | 1.0%             | (7) Least Potent               |                              | (1) Weak                        |
|                           |                                   | CREAM             | 2.5%             | (7) Least Potent               |                              | (1) Weak                        |
|                           |                                   | LOTION            | 1.0%             | (7) Least Potent               |                              | (1) Weak                        |
|                           |                                   | LOTION            | 2.0%             | (7) Least Potent               |                              | (1) Weak                        |
|                           |                                   | LOTION            | 2.5%             | (7) Least Potent               |                              | (1) Weak                        |
|                           |                                   | OINTMENT          | 0.5%             | (7) Least Potent               |                              | (1) Weak                        |
|                           |                                   | OINTMENT          | 1.0%             | (7) Least Potent               | (1) Mild                     | (1) Weak                        |
|                           |                                   | OINTMENT          | 2.5%             | (7) Least Potent               |                              | (1) Weak                        |
|                           | HYDROCORTISONE<br>PROBUTATE       | CREAM             | 0.1%             | (5) Lower Mid-Strength         |                              | (1) Weak                        |
|                           | HYDROCORTISONE<br>VALERATE        | CREAM             | 0.2%             | (5) Lower Mid-Strength         | (2) Moderate                 | (1) Weak                        |
|                           |                                   | OINTMENT          | 0.2%             | (5) Lower Mid-Strength         | (2) Moderate                 | (1) Weak                        |
| HYDROCORTISONE            | N.R                               | 1.0%              | (7) Least Potent | (1) Mild                       | (1) Weak                     |                                 |
|                           | SPRAY                             | 1.0%              | (7) Least Potent |                                | (1) Weak                     |                                 |



**eTable 3.** Final list of Topical Corticosteroid Potency Classifications (continued).

| ATC                                    | Corticosteroid              | Vehicle                 | Concentration | US Classification (7-Category) | Cochrane Review (4-Category) | ATC Classification (4-Category) |
|----------------------------------------|-----------------------------|-------------------------|---------------|--------------------------------|------------------------------|---------------------------------|
| HYDROCORTISONE<br>D07AA02 (cont'd)     | HYDROCORTISONE<br>(cont'd)  | CREAM                   | N.R           | (7) Least Potent               | (1) Mild                     | (1) Weak                        |
|                                        |                             | CREAM -<br>EMOLLIENT    | 1.0%          | (7) Least Potent               | (1) Mild                     | (1) Weak                        |
|                                        |                             | CREAM                   | 0.5%          | (7) Least Potent               | (1) Mild                     | (1) Weak                        |
|                                        |                             | CREAM                   | 1.0%          | (7) Least Potent               | (1) Mild                     | (1) Weak                        |
|                                        |                             | CREAM                   | 2.5%          | (7) Least Potent               |                              | (1) Weak                        |
|                                        |                             | GEL                     | 1.0%          | (7) Least Potent               |                              | (1) Weak                        |
|                                        |                             | LOTION                  | 0.5%          | (7) Least Potent               |                              | (1) Weak                        |
|                                        |                             | LOTION                  | 1.0%          | (7) Least Potent               |                              | (1) Weak                        |
|                                        |                             | LOTION                  | 2.0%          | (7) Least Potent               |                              | (1) Weak                        |
|                                        |                             | LOTION                  | 2.5%          | (7) Least Potent               |                              | (1) Weak                        |
|                                        |                             | OINTMENT -<br>EMOLLIENT | 0.5%          | (7) Least Potent               | (1) Mild                     | (1) Weak                        |
|                                        |                             | OINTMENT                | 0.5%          | (7) Least Potent               |                              | (1) Weak                        |
|                                        |                             | OINTMENT                | 1.0%          | (7) Least Potent               | (1) Mild                     | (1) Weak                        |
|                                        |                             | OINTMENT                | 2.5%          | (7) Least Potent               | (1) Mild                     | (1) Weak                        |
|                                        |                             | TOP PD                  | N.R           | (7) Least Potent               |                              | (1) Weak                        |
|                                        |                             | SOLUTION                | 0.5%          | (7) Least Potent               |                              | (1) Weak                        |
|                                        |                             | SOLUTION                | 1.0%          | (7) Least Potent               |                              | (1) Weak                        |
| SOLUTION                               | 2.5%                        | (7) Least Potent        |               | (1) Weak                       |                              |                                 |
| HYDROCORTISONE<br>ACEPONATE<br>D07AC16 | HYDROCORTISONE<br>ACEPONATE | CREAM                   | 0.1%          | (5) Lower Mid-Strength         |                              | (3) Potent                      |
|                                        |                             | OINTMENT                | 0.1%          | (4) Mid-Strength               |                              | (3) Potent                      |
| HYDROCORTISONE<br>BUTEPRATE D07AB11    | HYDROCORTISONE<br>BUTEPRATE | CREAM -<br>EMOLLIENT    | 0.1%          | (5) Lower Mid-Strength         | (2) Moderate                 | (2) Moderate                    |
| HYDROCORTISONE<br>BUTYRATE<br>D07AB02  | HYDROCORTISONE<br>BUTYRATE  | N.R                     | N.R           | (5) Lower Mid-Strength         | (3) Potent                   | (2) Moderate                    |
|                                        |                             | CREAM -<br>EMOLLIENT    | 0.1%          | (5) Lower Mid-Strength         | (3) Potent                   | (2) Moderate                    |
|                                        |                             | CREAM                   | 0.1%          | (5) Lower Mid-Strength         | (3) Potent                   | (2) Moderate                    |
|                                        |                             | LOTION                  | 0.1%          | (5) Lower Mid-Strength         | (3) Potent                   | (2) Moderate                    |
|                                        |                             | OINTMENT                | 0.1%          | (5) Lower Mid-Strength         | (3) Potent                   | (2) Moderate                    |
|                                        |                             | SOLUTION                | 0.1%          | (5) Lower Mid-Strength         |                              | (2) Moderate                    |

**eTable 3.** Final list of Topical Corticosteroid Potency Classifications (continued).

| ATC                                        | Corticosteroid                  | Vehicle                 | Concentration | US Classification (7-Category) | Cochrane Review (4-Category) | ATC Classification (4-Category) |
|--------------------------------------------|---------------------------------|-------------------------|---------------|--------------------------------|------------------------------|---------------------------------|
| METHYLPREDNISOLONE<br>D07AA01              | METHYLPREDNISOLONE              | N.R                     | N.R           | (7) Least Potent               |                              | (1) Weak                        |
|                                            | METHYLPREDNISOLONE<br>ACETATE   | CREAM                   | 0.25%         | (7) Least Potent               |                              | (1) Weak                        |
|                                            |                                 | LOTION                  | 0.25%         | (7) Least Potent               |                              | (1) Weak                        |
| METHYLPREDNISOLONE<br>ACEPONATE<br>D07AC14 | METHYLPREDNISOLONE<br>ACEPONATE | CREAM                   |               | (4) Mid-Strength               | (3) Potent                   | (3) Potent                      |
|                                            |                                 | CREAM                   | 0.1%          | (4) Mid-Strength               | (3) Potent                   | (3) Potent                      |
|                                            |                                 | LOTION                  | 0.1%          | (4) Mid-Strength               | (3) Potent                   | (3) Potent                      |
|                                            |                                 | OINTMENT -<br>EMOLLIENT | 0.1%          | (4) Mid-Strength               | (3) Potent                   | (3) Potent                      |
|                                            |                                 | OINTMENT                | 0.1%          | (4) Mid-Strength               | (3) Potent                   | (3) Potent                      |
| MOMETASONE<br>D07AC13                      | MOMETASONE                      | CREAM                   | N.R           | (4) Mid-Strength               | (3) Potent                   | (3) Potent                      |
|                                            | MOMETASONE FUROATE              | CREAM -<br>EMOLLIENT    | 0.1%          | (4) Mid-Strength               | (3) Potent                   | (3) Potent                      |
|                                            |                                 | CREAM                   | 0.1%          | (4) Mid-Strength               | (3) Potent                   | (3) Potent                      |
|                                            |                                 | LOTION                  | 0.1%          | (4) Mid-Strength               |                              | (3) Potent                      |
|                                            |                                 | OINTMENT                | 0.1%          | (2) Potent                     | (3) Potent                   | (3) Potent                      |
|                                            |                                 | SOLUTION                | 0.1%          | (4) Mid-Strength               |                              | (3) Potent                      |
|                                            |                                 |                         |               |                                |                              |                                 |
| PREDNICARBATE<br>D07AC18                   | PREDNICARBATE                   | CREAM -<br>EMOLLIENT    | 0.1%          | (5) Lower Mid-Strength         |                              | (3) Potent                      |
|                                            |                                 | CREAM                   | 0.05%         | (6) Mild                       |                              | (3) Potent                      |
|                                            |                                 | CREAM                   | 0.1%          | (5) Lower Mid-Strength         |                              | (3) Potent                      |
|                                            |                                 | CREAM                   | 0.25%         | (4) Mid-Strength               | (2) Moderate                 | (3) Potent                      |
|                                            |                                 | OINTMENT                | N.R           | (5) Lower Mid-Strength         | (2) Moderate                 | (3) Potent                      |
|                                            |                                 | OINTMENT -<br>EMOLLIENT | 0.1%          | (4) Mid-Strength               |                              | (3) Potent                      |
|                                            |                                 | OINTMENT                | 0.05%         | (6) Mild                       |                              | (3) Potent                      |
|                                            |                                 | OINTMENT                | 0.1%          | (5) Lower Mid-Strength         |                              | (3) Potent                      |
| OINTMENT                                   | 0.25%                           | (4) Mid-Strength        | (2) Moderate  | (3) Potent                     |                              |                                 |

**eTable 3.** Final list of Topical Corticosteroid Potency Classifications (continued).

| ATC                      | Corticosteroid                   | Vehicle         | Concentration | US Classification (7-Category) | Cochrane Review (4-Category) | ATC Classification (4-Category) |
|--------------------------|----------------------------------|-----------------|---------------|--------------------------------|------------------------------|---------------------------------|
| PREDNISOLONE<br>D07AA03  | PREDNISOLONE                     | N.R             | N.R           | (7) Least Potent               |                              | (1) Weak                        |
|                          | PREDNISOLONE<br>VALERATE ACETATE | N.R             | 0.3%          | (4) Mid-Strength               | (2) Moderate                 | (1) Weak                        |
| TRIAMCINOLONE<br>D07AB09 | TRIAMCINOLONE<br>ACETONIDE       | SPRAY           | 0.2%          | (4) Mid-Strength               |                              | (2) Moderate                    |
|                          |                                  | CREAM           | 0.025%        | (6) Mild                       |                              | (2) Moderate                    |
|                          |                                  | CREAM           | 0.1%          | (5) Lower Mid-Strength         |                              | (2) Moderate                    |
|                          |                                  | CREAM           | 0.5%          | (3) Upper Mid-Strength         |                              | (2) Moderate                    |
|                          |                                  | LOTION          | 0.025%        | (6) Mild                       |                              | (2) Moderate                    |
|                          |                                  | LOTION          | 0.1%          | (5) Lower Mid-Strength         |                              | (2) Moderate                    |
|                          |                                  | OINTMENT        | 0.025%        | (5) Lower Mid-Strength         |                              | (2) Moderate                    |
|                          |                                  | OINTMENT        | 0.05%         | (4) Mid-Strength               |                              | (2) Moderate                    |
|                          |                                  | OINTMENT        | 0.1%          | (4) Mid-Strength               | (3) Potent                   | (2) Moderate                    |
|                          |                                  | OINTMENT        | 0.5%          | (3) Upper Mid-Strength         |                              | (2) Moderate                    |
|                          | SOLUTION                         | 0.01%           | (6) Mild      |                                | (2) Moderate                 |                                 |
|                          | TRIAMCINOLONE                    | SPRAY           | 0.1%          | (4) Mid-Strength               |                              | (2) Moderate                    |
|                          |                                  | CREAM           | 0.1%          | (5) Lower Mid-Strength         | (3) Potent                   | (2) Moderate                    |
|                          |                                  | OINTMENT        | 0.1%          | (4) Mid-Strength               | (3) Potent                   | (2) Moderate                    |
| ULOBETASOL<br>D07AC21    | ULOBETASOL                       | AEROSOL<br>FOAM | 0.05%         | (1) Super Potent               |                              | (3) Potent                      |
|                          | HALOBETASOL<br>PROPIONATE        | CREAM           | 0.05%         | (1) Super Potent               | (4) Very Potent              | (3) Potent                      |
|                          |                                  | LOTION          | 0.01%         | (2) Potent                     |                              | (3) Potent                      |
|                          |                                  | LOTION          | 0.05%         | (1) Super Potent               |                              | (3) Potent                      |
|                          |                                  | OINTMENT        | 0.05%         | (1) Super Potent               |                              | (3) Potent                      |
| ATC N.R                  | TRALONIDE                        | OINTMENT        | 0.025%        | (4) Mid-Strength               | (3) Potent                   |                                 |

Abbreviation: N.R, Not Reported

## eFigure 1. Flowchart Outlining the Process of Developing a TCS List and Assigning a 7-Category Potency Classification Based on the US System

**STEP 1:** A dataset was created for each potency source. The number of unique values (by corticosteroid, vehicle, and concentration) is shown below.

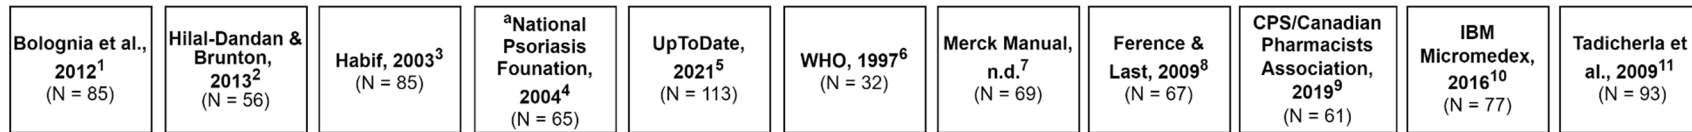

**STEP 2:** Datasets were merged by corticosteroid, vehicle, and concentration. Additional TCS were identified and assigned to a potency classification and merged into a dataset. An average potency category was first calculated within each source (to account for TCS assigned to >1 category) and then across the sources. Unique values were determined by corticosteroid, vehicle, and concentration.

Merged Dataset  
(N = 252)

Additional TCS from Ontario Drug Benefit Formulary<sup>b</sup>  
(N = 13)

Unique Values  
(N = 187)

**STEP 3:** TCS were manually assigned to a category if they were not classified in previous data sources, or if their assigned category was incoherent with other TCS classifications.<sup>c</sup> Potency categories that were inconsistent between sources were flagged as discrepant.

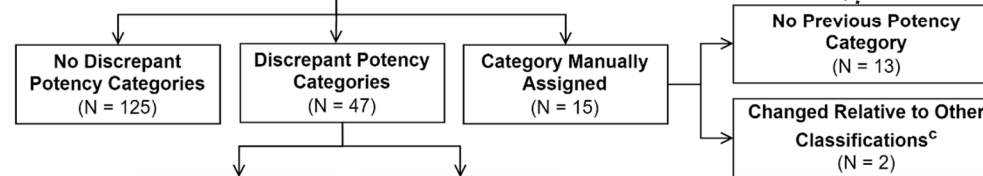

**STEP 4:** TCS with discrepant categories between sources assigned to a potency classification using the following algorithm:

- If there was no majority value, then UpToDate value was assigned.
- If there was a majority value, the majority values was assigned.

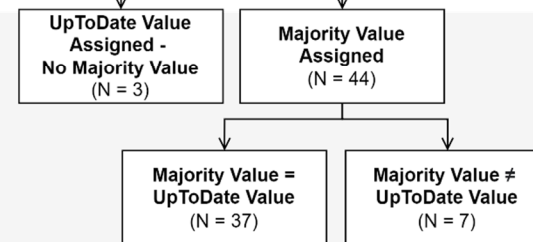

<sup>a</sup>Cited by Mikhail & Scheinfeld (2004)

<sup>b</sup>Available from: <https://www.formulary.health.gov.on.ca/formulary/>; these TCS formulations were not included in any of the other potency sources and manually assigned to a potency category.

<sup>c</sup>The complete list of manual changes is shown in eTable1.

**eFigure 2.** Flowchart of the Process of Assigning the ATC Classifications to the Combined List of TCSs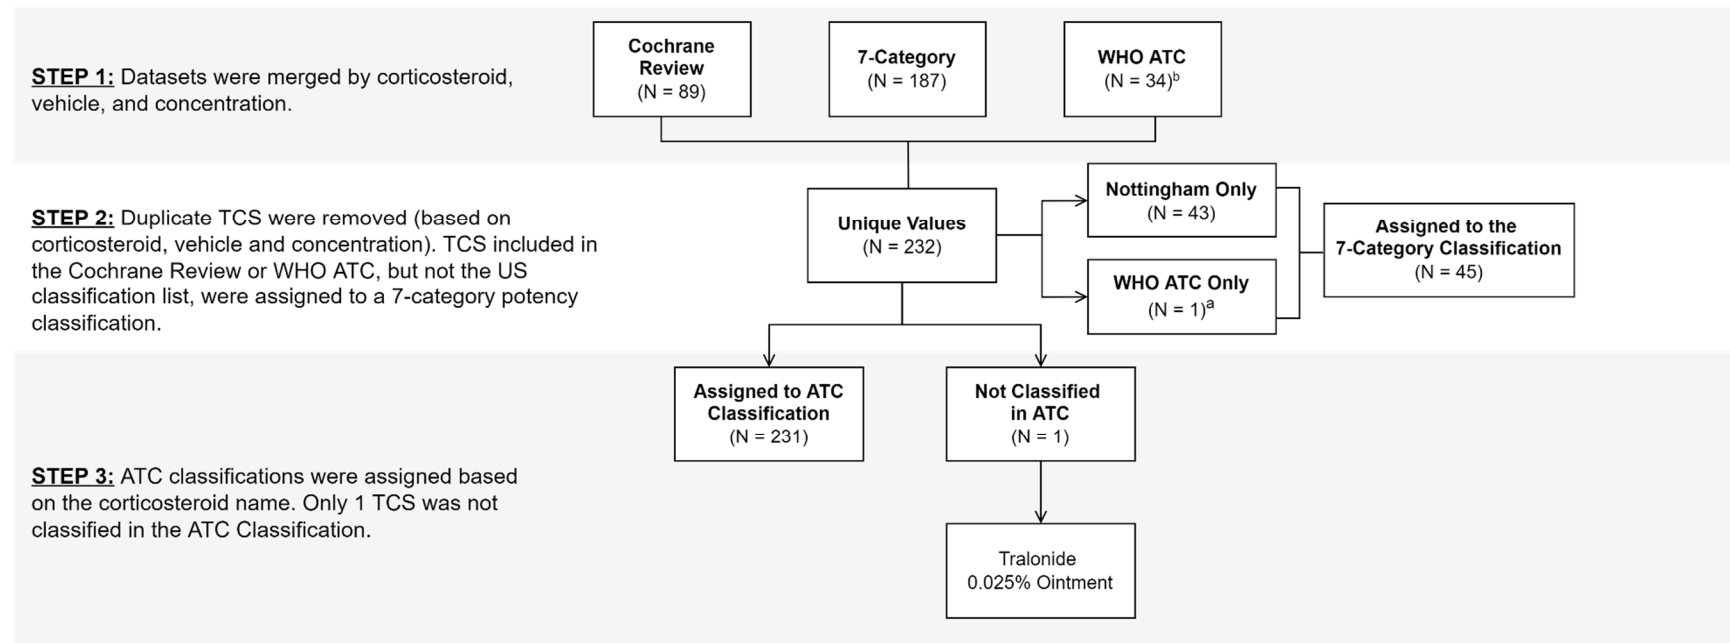

<sup>a</sup>We included 2 additional TCS identified in the literature that corresponded to the ATC classification; these were manually assigned to a 7-category classification.

<sup>b</sup>We excluded ATC corticosteroids that were never marketed (Fluperolone) and those not indicated for the treatment of inflammatory dermatological diseases (Budesonide, Fluorometholone, Difluprednate).

**eReferences.**

1. Bologna JL, Jorizzo JL, Schaffer JV. *Dermatology 3rd Ed.* 3 ed. vol 2. Elsevier Saunders; 2012.
2. Hilal-Dandan R, Brunton LL. *Goodman and Gilman's Manual of Pharmacology and Therapeutics 2nd Edition.* 2 ed. McGraw-Hill Education; 2013.
3. Habif TP. *Clinical Dermatology: A Color Guide to Diagnosis and Therapy.* vol 116. Mosby; 2004.
4. Maryann M, Scheinfeld N. Evidence-based review of topical treatments for psoriasis. *Advanced Studies in Medicine.* 2004;4:420-432.
5. Table: Comparison of representative topical corticosteroid preparations (classified according to the United States system) In: UpToDate. Accessed 19 Aug 2021.  
[https://www.uptodate.com/contents/image?imageKey=DERM%2F62402&topicKey=DERM%2F1730&source=see\\_link](https://www.uptodate.com/contents/image?imageKey=DERM%2F62402&topicKey=DERM%2F1730&source=see_link)
6. Table: Classification of topical corticosteroids. In: WHO Model Prescribing Information: Drugs Used in Skin Diseases. Accessed 19 Aug 2021.  
<https://digicollections.net/medicinedocs/#d/h2918e>
7. Table: Relative Potency of Selected Topical Corticosteroids. In: Merck Manual. Accessed 22 Sept 2021. <https://www.merckmanuals.com/en-ca/professional/multimedia/table/v959652>
8. Ference JD, Last AR. Choosing topical corticosteroids. *Am Fam Physician.* 2009;79(2):135-140.
9. Corticosteroids: Topical - CPhA Monograph. In: CPS Drug Information. <https://www.myrxtx.ca/new/documents/MONOGRAPH/en/CorticosteroidsTopical>. Subscription required to view.
10. Class Comparison: Topical Corticosteroids (Selected). In: IBM Micromedex. Accessed 22 Sept 2021. <https://micromedexsolutions.com>. Subscription required to view.
11. Tadicherla S, Ross K, Shenefelt PD, Fenske NA. Topical corticosteroids in dermatology. *J Drugs Dermatol.* Dec 2009;8(12):1093-105.

12. Malone T, Haleblan JK, Poulsen BJ, Burdick KH. Development and evaluation of ointment and cream vehicles for a new topical steroid, fluclorolone acetonide. *Br J Dermatol*. Feb 1974;90(2):187-95. doi:10.1111/j.1365-2133.1974.tb06384.x
13. Black MM, Platt NE, Mugglestone CJ. A study of potential skin atrophy following topical application of weak corticosteroids. *Curr Med Res Opin*. 1981;7(7):463-70. doi:10.1185/03007998109114285
14. Munro DD, Wilson HT, Rhodes EL. Comparison of betamethasone 17-valerate ointment with fluocortolone and fluocortolone caproate ointment. *Br Med J*. Nov 4 1967;4(5574):275-6. doi:10.1136/bmj.4.5574.275
15. Brazzini B, Pimpinelli N. New and established topical corticosteroids in dermatology: clinical pharmacology and therapeutic use. *Am J Clin Dermatol*. 2002;3(1):47-58. doi:10.2165/00128071-200203010-00005
16. Christoffers WA, Coenraads PJ, Svensson Å, et al. Interventions for hand eczema. *Cochrane Database Syst Rev*. Apr 26 2019;4(4):Cd004055. doi:10.1002/14651858.CD004055.pub2
17. Meyer E, Smith EW, Haigh JM, Kanfer I. Potency ranking of two new topical corticosteroid creams containing 0.1% desonide or 0.05% halometasone utilising the human skin blanching assay. *Arzneimittelforschung*. Dec 1988;38(12):1840-3.
18. Hydrocortisone, Hydrocortisone Acetate, Hydrocortisone Buteprate, Hydrocortisone Butyrate, Hydrocortisone Valerate (Topical). In: Lexicomp (AHFS Essentials (Adult and Pediatric)). [updated 26 Feb 2021]. Accessed 19 Nov 2021. <https://online.lexi.com>. Subscription required to view.
19. Mooney E, Rademaker M, Dailey R, et al. Adverse effects of topical corticosteroids in paediatric eczema: Australasian consensus statement. *Australas J Dermatol*. Nov 2015;56(4):241-51. doi:10.1111/ajd.12313
20. Chong M, Fonacier L. Treatment of Eczema: Corticosteroids and Beyond. *Clin Rev Allergy Immunol*. Dec 2016;51(3):249-262. doi:10.1007/s12016-015-8486-7
21. Mori M, Pimpinelli N, Giannotti B. Topical corticosteroids and unwanted local effects. Improving the benefit/risk ratio. *Drug Saf*. May 1994;10(5):406-12. doi:10.2165/00002018-199410050-00005
22. Bruni G, Peverelli G. Clinical Evaluation of a Non-Fluorinated Topical Corticosteroid: Prednisolone 17-Valerate, 21-Acetate. *Journal of International Medical Research*. 1974;2(3):240-243. doi:10.1177/030006057400200311

23. Cullen SI. Clinical evaluation of tralonide ointment, a new topical steroid. *Curr Ther Res Clin Exp*. Sep 1971;13(9):595-601.
24. Tay YK, Chan YC, Chandran NS, et al. Guidelines for the Management of Atopic Dermatitis in Singapore. *Ann Acad Med Singap*. Oct 2016;45(10):439-450.
25. McHugh ML. Interrater reliability: the kappa statistic. *Biochem Med (Zagreb)*. 2012;22(3):276-282. doi:10.11613/BM.2012.031
26. The BMJ. Correlation and regression. Accessed Dec 01, 2021. <https://www-bmj-com.proxy.queensu.ca/about-bmj/resources-readers/publications/statistics-square-one/11-correlation-and-regression>
